# Supplementary material for: PEG based random copolymer micelles as drug carriers: the effect of hydrophobe content on drug solubilization and cytotoxicity
Source: Royal Society of Chemistry journal article supplement (doi:10.1039/c4ra11479e), 2015-01-01
Supplement: c4ra11479e1.pdf [file c4ra11479e1.pdf]

## PEG based random copolymer micelles as drug carriers: Effect of hydrophobe content on drug solubilization and cytotoxicity

Partha Laskar<sup>a</sup>, Biswajit Saha<sup>b</sup>, Sudip kumar Ghosh<sup>b\*</sup> and Joykrishna Dey<sup>a,\*</sup>

<sup>a</sup>Department of Chemistry, <sup>b</sup>Department of Biotechnology, Indian Institute of Technology, Kharagpur-721 302, India.

### 1. Synthesis of 2-(2-cyanopropyl)-dithiobenzoate (CPDB)

Chain transfer agent (CTA), 2-(2-cyanopropyl)-dithiobenzoate (CPDB) for RAFT polymerization was synthesized starting from benzyl chloride by using elemental sulphur, potassium ferricyanide ( $K_3[Fe(CN)_6]$ ) and AIBN following the reported method.<sup>1</sup>

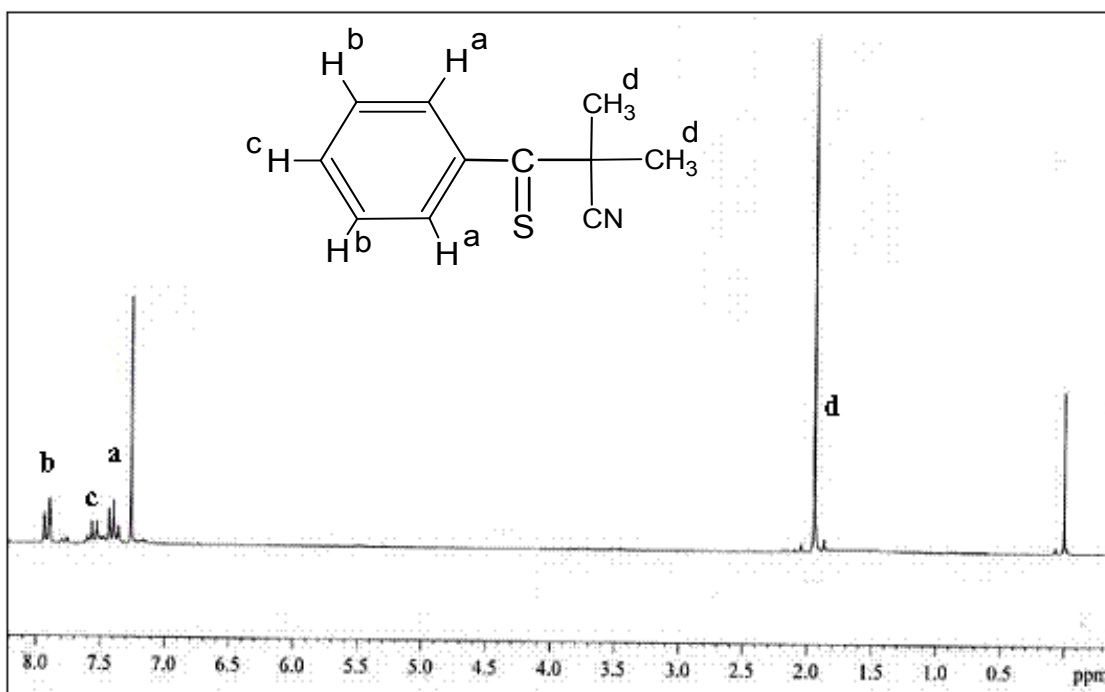

**Figure S1.** <sup>1</sup>H NMR (400MHz) spectrum of CPDB in CDCl<sub>3</sub>.

## 2. Synthesis of Polymers

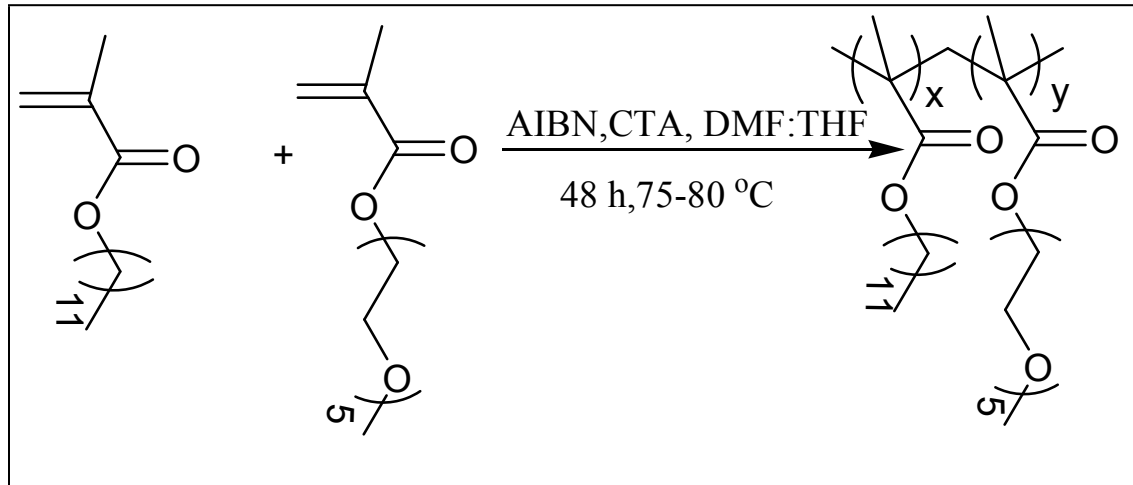

Scheme S1. General synthetic scheme for poly[DMA<sub>x</sub>-co-mPEG<sub>y</sub>] copolymers.

## 3. NMR Spectrum of Polymers

P<sub>12</sub>

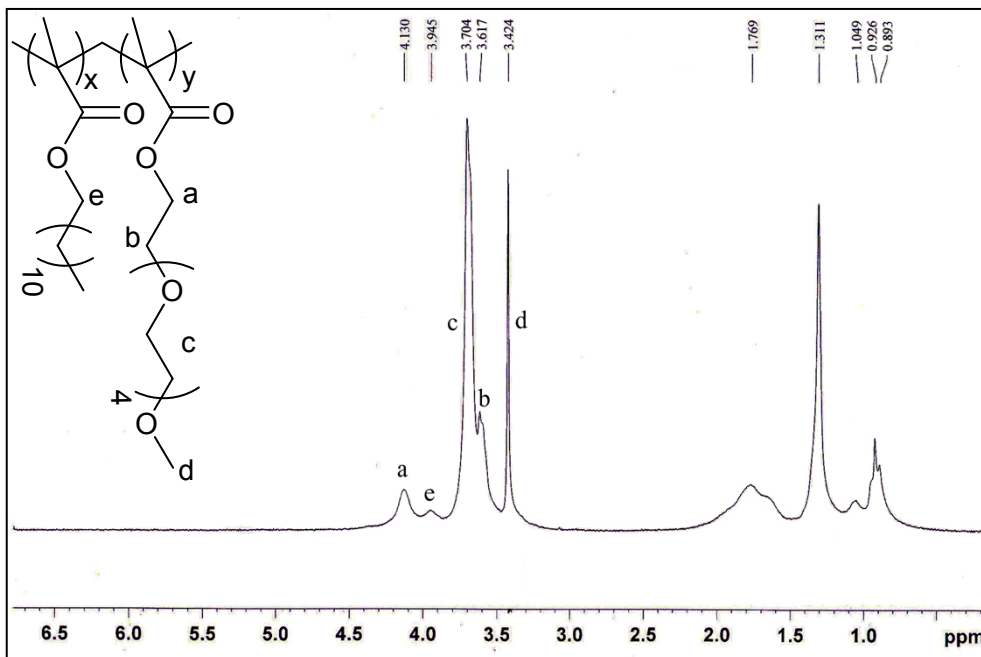

Figure S2. <sup>1</sup>H NMR (400MHz) spectrum of P<sub>12</sub> in CDCl<sub>3</sub>.

**P<sub>14</sub>**

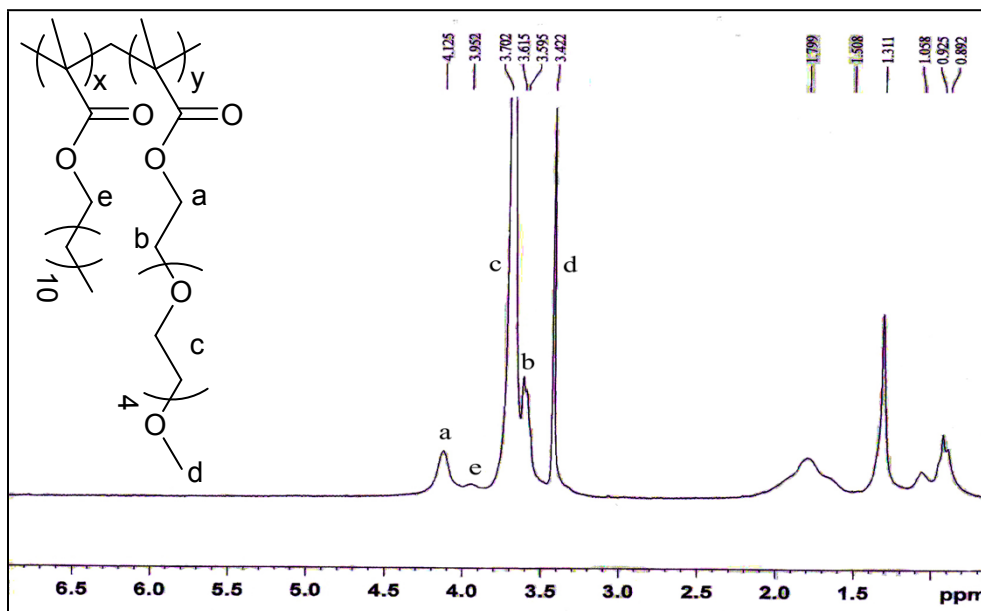

**Figure S3.** <sup>1</sup>H NMR (400MHz) spectrum of **P<sub>14</sub>** in CDCl<sub>3</sub>.

**P<sub>16</sub>**

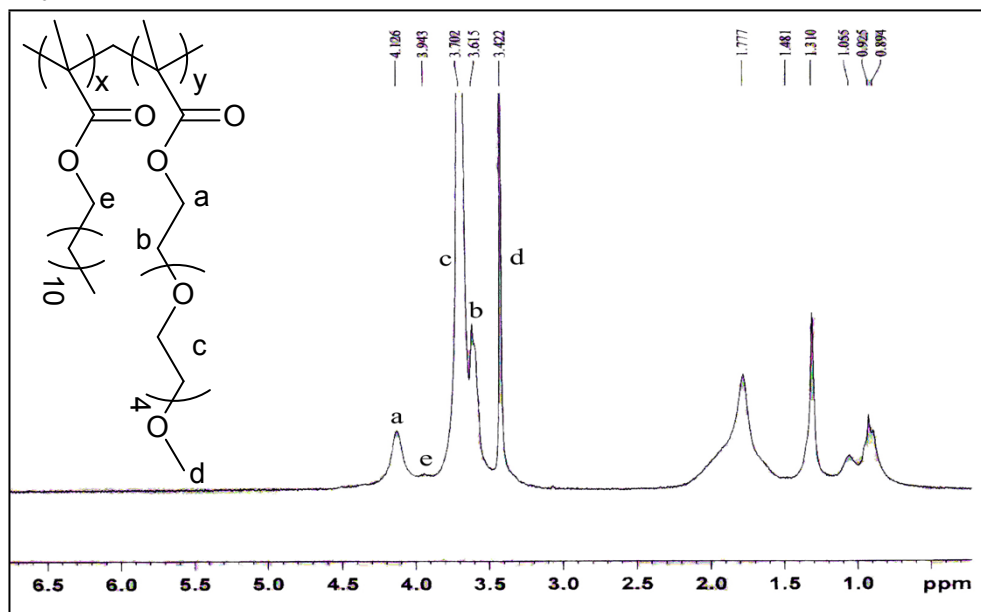

**Figure S4.** <sup>1</sup>H NMR (400MHz) spectrum of **P<sub>16</sub>** in CDCl<sub>3</sub>.

#### 4. GPC Result of the polymers

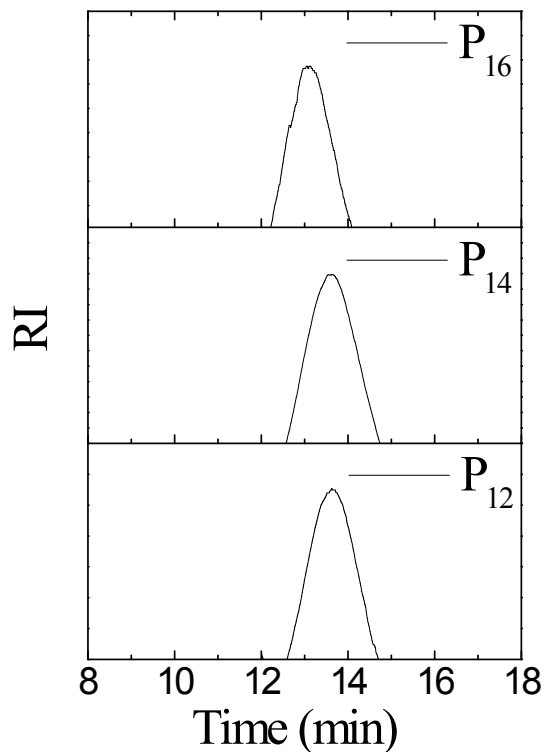

**Figure S5.** Plots of RI (refractive index) vs Time in GPC profile to determine molecular weight.

#### 5. Shift of $\lambda_{\max}$ of NPN probe

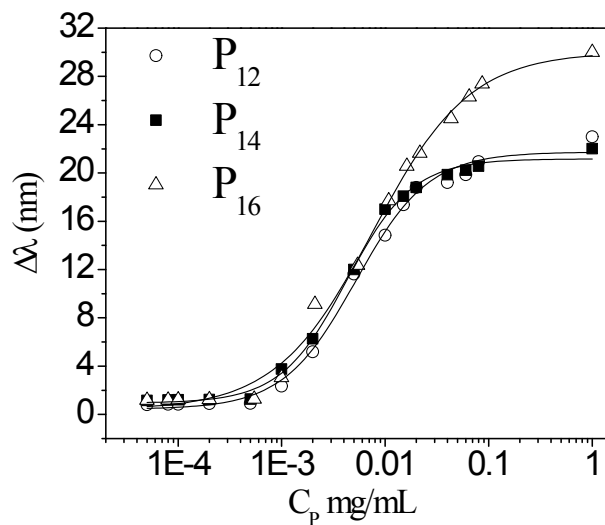

**Figure S6.** Plots of shift of emission maximum [ $\Delta\lambda = \lambda_{\max}(\text{water}) - \lambda_{\max}(\text{polymer})$ ] of NPN probe with increasing concentration ( $C_p$ , mg/mL) of the polymer solutions.

## 6. Hydrodynamic size distribution at different concentrations

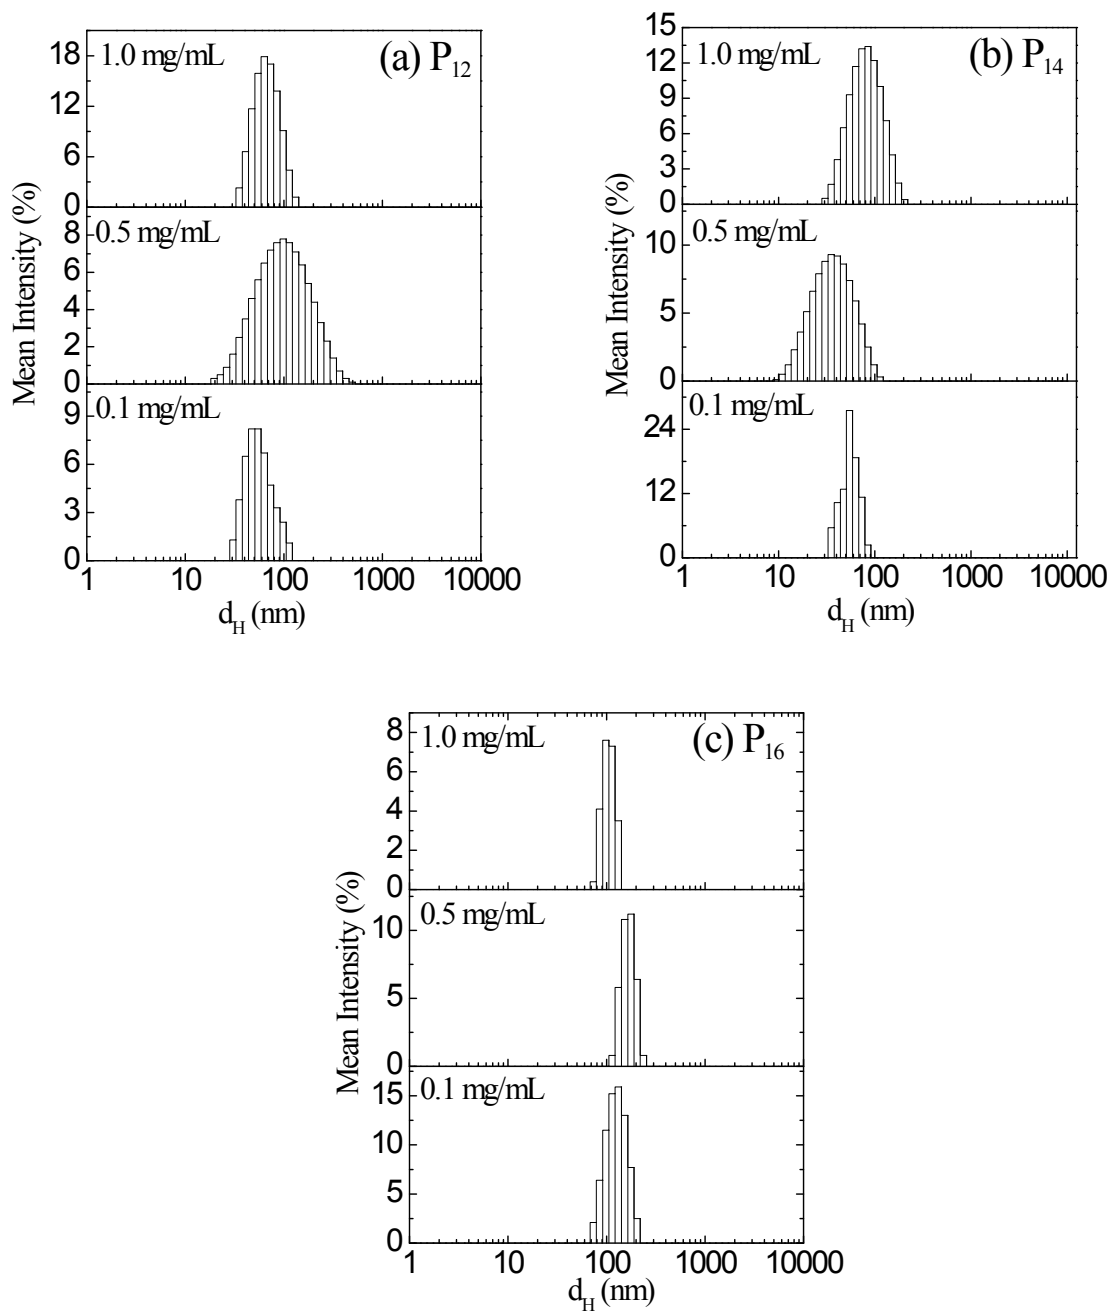

**Figure S7.** Hydrodynamic size (diameter,  $d_H$ ) distribution profile at different concentrations (1.0, 0.5, and 0.1 mg/mL) of the PMs at 298 K.

## 7. Anisotropy measurement using DPH as fluorescent probe

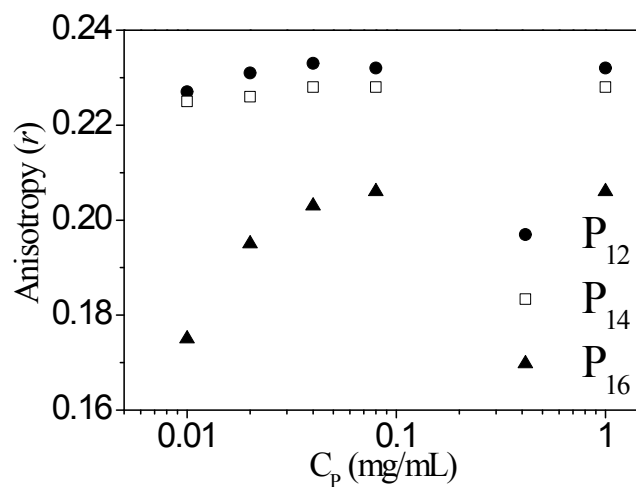

**Figure S8.** Plot of anisotropy ( $r$ ) values at different polymer concentrations ( $C_p$ , mg/mL) at 25 °C.

**Table S1.** Microviscosity ( $\eta_m$ ), and fluorescence lifetime ( $\tau_f$ ) and fluorescence anisotropy ( $r$ ) vales of DPH probe in 1.0 mg/mL polymer solutions.

| HMPs            | $r$<br>( $\pm 0.001$ ) | $\tau_f$<br>( $\pm 0.1$ ) ns | $\eta_m$ (mPa s) |
|-----------------|------------------------|------------------------------|------------------|
| P <sub>12</sub> | 0.232                  | 7.5                          | 175              |
| P <sub>14</sub> | 0.228                  | 6.3                          | 141              |
| P <sub>16</sub> | 0.206                  | 6.0                          | 104              |

## 8. Camptothecin solubilization

The drug-loading content (%) and drug-entrapment efficiency (%) have been calculated by using the following equations-

Drug-loading content (%) = (Weight of the drug in the polymer/Weight of the polymer) x 100

Drug-entrapment efficiency (%) = (Weight of the drug in the polymer/Weight of the drug feed initially) x 100

**Table S2.** Drug-loading content (%) & drug-entrapment efficiency (%) for all the CPT encapsulated polymers ( $C_p$  1.0 mg/mL) in water at 298 K.

| Copolymers      | Drug-loading content (%) | Drug entrapment efficiency (%) |
|-----------------|--------------------------|--------------------------------|
| P <sub>12</sub> | 2.0                      | 40                             |
| P <sub>14</sub> | 2.32                     | 46.46                          |
| P <sub>16</sub> | 2.96                     | 59.3                           |

## 9. Fluorescence spectra of Camptothecin (CPT)

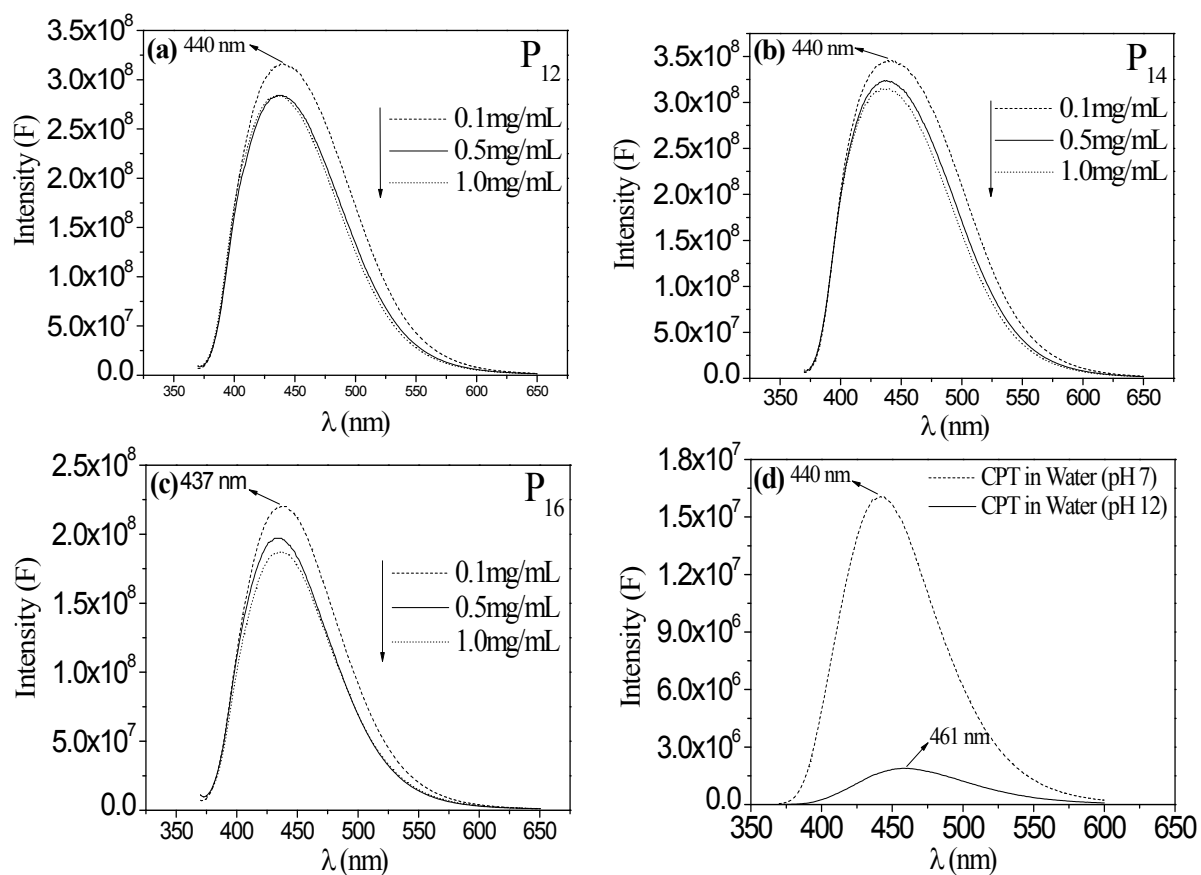

**Figure S9.** Fluorescence Spectra of CPT drug - (a, b, c) in presence of polymers and (d) at different pH.



## 10. Thermal stability of the PMs (at lower conc)

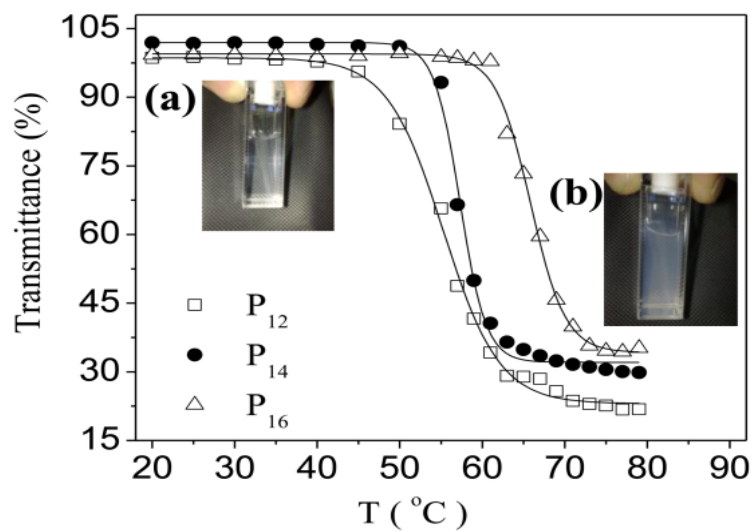

**Figure S10.** Plots of transmittance (%T) as a function of temperature (°C) for 0.5 mg/mL polymer solution in aqueous media. Inset: (a) & (b) are the photographs of the polymer solutions below and above the LCST respectively. At comparatively lower concentration (unlike at 1.0 mg/mL), all the polymer solutions show a very low but not exactly zero transmittance after LCST.

## 11. DLS study at different temperature

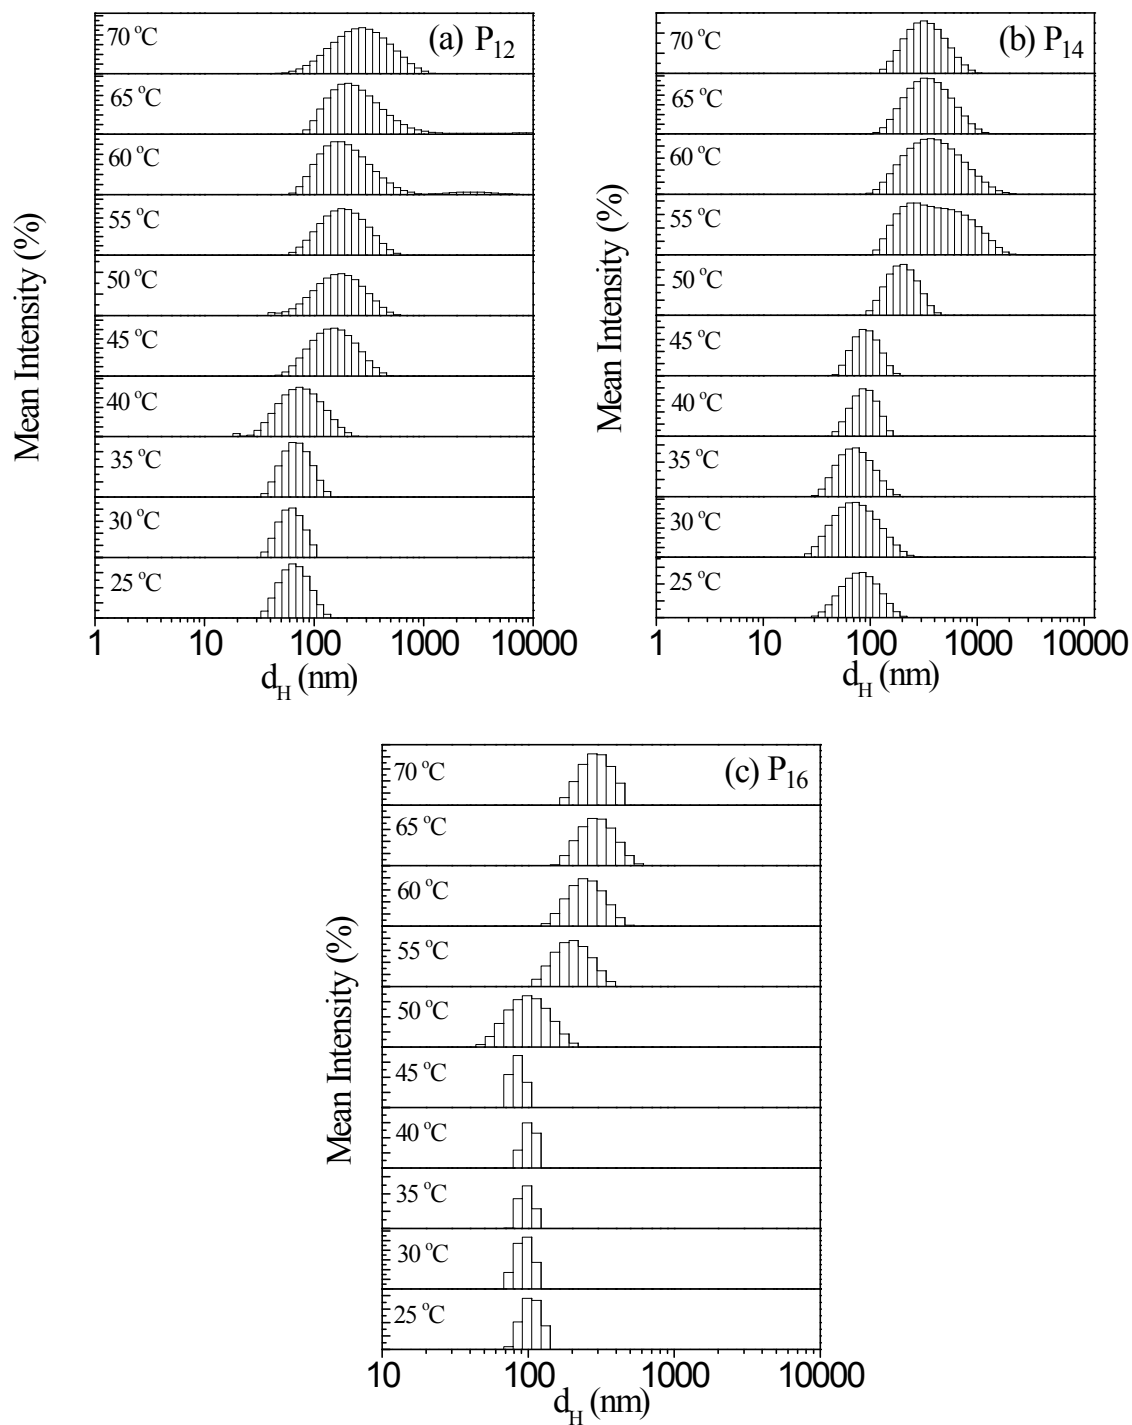

**Figure S11.** Plots of the hydrodynamic size distribution (diameter,  $d_H$ ) at various temperature (25-70 °C) for all the polymers ( $C_p$  1.0 mg/mL) in aqueous media.

## 12. DLS of polymeric aggregates at different pH

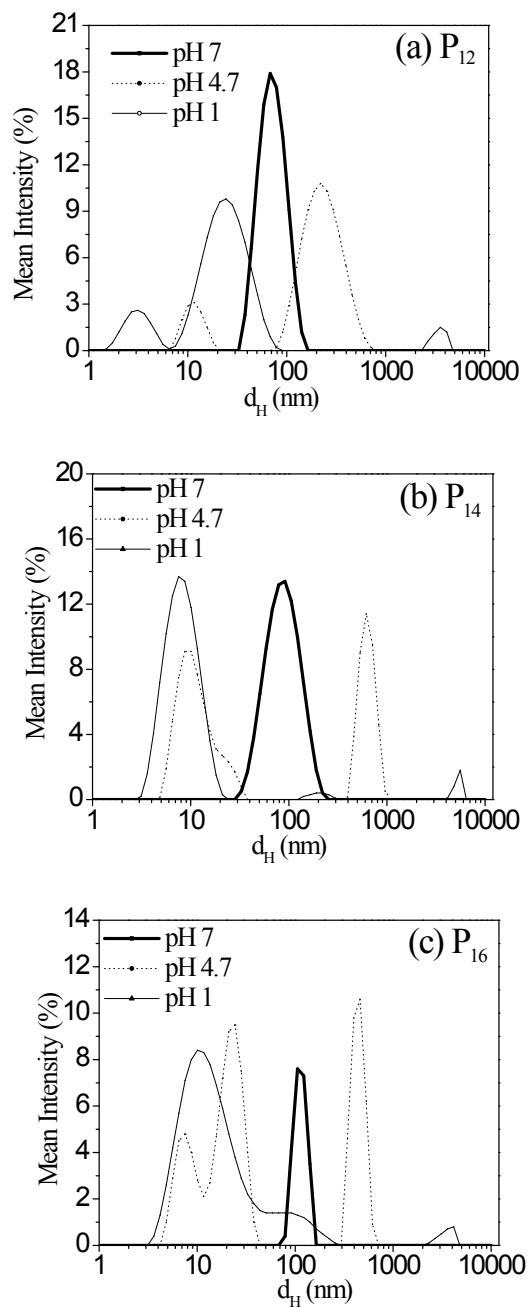

**Figure S12.** Hydrodynamic size (diameter,  $d_H$ ) distribution profile of polymeric micelles at different pH (pH 7, 4.7 and 1) after 14 h of incubation. Concentration of the copolymer ( $C_p$ ) was 1.0 mg/mL for each of the study.

### 13. In Vitro Cytotoxicity on L929 (normal cells)

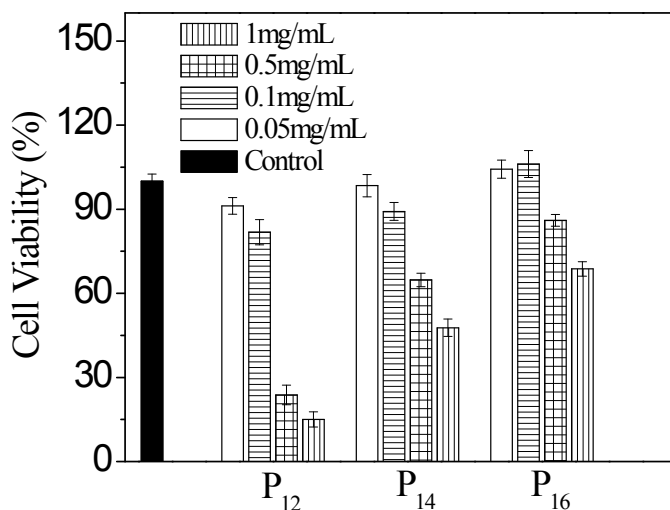

**Figure S13.** Cytotoxicity effects of the polymers on L929 cells. The cells were treated for 24 h with both the polymers at a concentration ranging from 0.05 to 1.0 mg/mL. Cell viability was measured by MTT assay and it was expressed as the percentage of growth with respect to untreated control cells. The data were presented as the mean  $\pm$  SD.

#### Reference

[1] Perrier, S., Barner-Kowollik, C., Quinn, J. F., Vana, P., & Davis, T. P. Origin of inhibition effects in the reversible addition fragmentation chain transfer (RAFT) polymerization of methyl acrylate. *Macromolecules* **2002**, 35(22), 8300-8306.
